# Supplementary material for: Autologous Transplantation Using Donor Leukocytes Loaded Ex Vivo with Oncolytic Myxoma Virus Can Eliminate Residual Multiple Myeloma
Source: PubMed Central journal article supplement — Mol Ther Oncolytics. 2020 Jun 24;18:171–88. doi: 10.1016/j.omto.2020.06.011 (PMC7364119; doi:10.1016/j.omto.2020.06.011), 2020-06-24
Supplement: mmc1.pdf [file mmc1.pdf]

**OMTO, Volume 18**

## **Supplemental Information**

**Autologous Transplantation Using Donor**

**Leukocytes Loaded *Ex Vivo* with Oncolytic Myxoma**

**Virus Can Eliminate Residual Multiple Myeloma**

**Nancy.Y. Villa, Masmudur M. Rahman, Joseph. Mamola, Julia D'Isabella, Elizabeth Goras, Jacquelyn Kilbourne, Kenneth Lowe, Juliane Daggett-Vondras, Lino Torres, John Christie, Nicole Appel, Anna L. Cox, Jae B. Kim, and Grant McFadden**

1 **Table 1. Percentages of different immune cell populations from Balb/c**  
 2 **BM or PBMCs.**

| <b>Immune populations</b>  | <b>Percentage from BM (Mean <math>\pm</math> SE)</b> | <b>Percentage from PBMCs (Mean <math>\pm</math> SE)</b> |
|----------------------------|------------------------------------------------------|---------------------------------------------------------|
| CD3 <sup>+</sup>           | 3.5 $\pm$ 0.7                                        | 31.6 $\pm$ 2.9                                          |
| CD4 <sup>+</sup>           | 1.0 $\pm$ 0.0                                        | 69.5 $\pm$ 4.5                                          |
| CD8 <sup>+</sup>           | 1.0 $\pm$ 0.0                                        | 11.5 $\pm$ 0.9                                          |
| Neutrophils                | 36.9 $\pm$ 3.6                                       | 4.2 $\pm$ 0.4                                           |
| Natural killer cells (NKs) | 1.04 $\pm$ 0.04                                      | 27.2 $\pm$ 9.4                                          |

3 SE, stands for standard error

4  
5  
6  
7  
8  
9  
10  
11  
12  
13  
14  
15  
16  
17  
18  
19  
20  
21  
22  
23  
24  
25  
26

27 **Table 2. Levels of pro-immune molecules secreted from bone marrow myeloma tumor**  
 28 **microenvironment (TME) after 3 or 24 hours of treatment. The Means  $\pm$  SD of levels of the**  
 29 **secreted molecules are shown.**

| <b>After 3 hours</b> | <b>Vehicle (1x-PBS)</b> | <b>BM</b> | <b>PBMCs</b> | <b>MYXV</b> | <b>BM + MYXV</b> | <b>PBMCs + MYXV</b> |
|----------------------|-------------------------|-----------|--------------|-------------|------------------|---------------------|
|----------------------|-------------------------|-----------|--------------|-------------|------------------|---------------------|

|                                                 |                         |                    |                   |                    |                    |                     |
|-------------------------------------------------|-------------------------|--------------------|-------------------|--------------------|--------------------|---------------------|
| <b>IFN-<math>\gamma</math> (Th<sub>1</sub>)</b> | 15.5 $\pm$ 4.5          | 13.0 $\pm$ 0.0     | 20.0 $\pm$ 5.0    | 21.5 $\pm$ 7.3     | 103.7 $\pm$ 6.3    | 17.7 $\pm$ 1.3      |
| <b>IL-10 (Th<sub>1</sub>)</b>                   | 735.0 $\pm$ 222.0       | 1082.5 $\pm$ 112.5 | 895.5 $\pm$ 106.0 | 981.0 $\pm$ 125.4  | 4034.8 $\pm$ 78.3  | 1676.3 $\pm$ 223.7  |
| <b>IL-12p70 (Th<sub>1</sub>)</b>                | 3.5 $\pm$ 0.0           | 3.7 $\pm$ 0.2      | 4.0 $\pm$ 0.5     | 3.8 $\pm$ 1.4      | 6.1 $\pm$ 0.3      | 5.0 $\pm$ 0.3       |
| <b>IL-4 (Th<sub>2</sub>)</b>                    | 11.3 $\pm$ 1.5          | 12.8 $\pm$ 4.5     | 15.5 $\pm$ 0.7    | 10.5 $\pm$ 2.5     | 15.6 $\pm$ 3.8     | 10.5 $\pm$ 2.2      |
| <b>IL-5 (Th<sub>2</sub>)</b>                    | 7.0 $\pm$ 4.0           | 7.2 $\pm$ 0.2      | 10.7 $\pm$ 3.2    | 7.0 $\pm$ 3.1      | 11.7 $\pm$ 4.2     | 10.7 $\pm$ 0.9      |
| <b>TNF<math>\alpha</math></b>                   | 53.5 $\pm$ 14.0         | 60.7 $\pm$ 1.2     | 53.3 $\pm$ 1.7    | 47.5 $\pm$ 5.5     | 83.5 $\pm$ 8.7     | 65.2 $\pm$ 2.3      |
| <b>IL-1<math>\alpha</math></b>                  | 38.7 $\pm$ 6.2          | 35.5 $\pm$ 8.0     | 30.2 $\pm$ 3.7    | 34.8 $\pm$ 6.0     | 66.2 $\pm$ 12.2    | 34.8 $\pm$ 3.4      |
| <b>IL-1<math>\beta</math></b>                   | 112.0 $\pm$ 43.0        | 52.7 $\pm$ 8.7     | 83.0 $\pm$ 12.0   | 73.3 $\pm$ 5.2     | 167.2 $\pm$ 32.2   | 81.0 $\pm$ 7.0      |
| <b>GM-CSF</b>                                   | 3.0 $\pm$ 0.0           | 2.5 $\pm$ 0.5      | 35.5 $\pm$ 0.5    | 3.3 $\pm$ 0.7      | 4.7 $\pm$ 0.3      | 2.7 $\pm$ 0.3       |
| <b>MIP-1<math>\alpha</math></b>                 | 341.0 $\pm$ 179.0       | 371.2 $\pm$ 2.2    | 301.5 $\pm$ 69.5  | 449.8 $\pm$ 43.0   | 1515.8 $\pm$ 238.2 | 380.7 $\pm$ 51.8    |
| <b>IL-6</b>                                     | 17.5 $\pm$ 2.5          | 14.7 $\pm$ 1.2     | 12.0 $\pm$ 2.0    | 14.3 $\pm$ 1.9     | 20.2 $\pm$ 0.4     | 13.0 $\pm$ 1.7      |
| <b>After 24 hours</b>                           | <b>Vehicle (1x-PBS)</b> | <b>BM</b>          | <b>PBMCs</b>      | <b>MYXV</b>        | <b>BM+MYXV</b>     | <b>PBMCs + MYXV</b> |
| <b>IFN-<math>\gamma</math> (Th<sub>1</sub>)</b> | 20.0 $\pm$ 2.1          | 10.0 $\pm$ 1.5     | 9.0 $\pm$ 1.5     | 573.3 $\pm$ 225.2  | 196.2 $\pm$ 28.9   | 170.0 $\pm$ 5.6     |
| <b>IL-10 (Th<sub>1</sub>)</b>                   | 1110.0 $\pm$ 71.0       | 741.3 $\pm$ 64.6   | 714.3 $\pm$ 51.6  | 2080.0 $\pm$ 106.0 | 1376.0 $\pm$ 187.3 | 1670.3 $\pm$ 60.4   |
| <b>IL-12p70 (Th<sub>1</sub>)</b>                | 2.5 $\pm$ 0.0           | 2.8 $\pm$ 0.9      | 2.2 $\pm$ 0.3     | 7.4 $\pm$ 1.1      | 5.1 $\pm$ 0.4      | 4.1 $\pm$ 0.2       |
| <b>IL-4 (Th<sub>2</sub>)</b>                    | 6.8 $\pm$ 1.5           | 5.3 $\pm$ 1.0      | 7.3 $\pm$ 1.2     | 21.0 $\pm$ 4.2     | 9.7 $\pm$ 0.7      | 14.2 $\pm$ 1.7      |
| <b>IL-5 (Th<sub>2</sub>)</b>                    | 4.5 $\pm$ 0.5           | 4.0 $\pm$ 0.3      | 5.0 $\pm$ 0.6     | 10.7 $\pm$ 1.6     | 7.4 $\pm$ 0.5      | 9.6 $\pm$ 0.4       |
| <b>TNF<math>\alpha</math></b>                   | 32.0 $\pm$ 2.5          | 258 $\pm$ 3.8      | 22.2 $\pm$ 4.5    | 44.2 $\pm$ 6.1     | 812.6 $\pm$ 124.1  | 24.5 $\pm$ 2.1      |
| <b>IL-1<math>\alpha</math></b>                  | 41.0 $\pm$ 10.5         | 19.5 $\pm$ 2.3     | 14.5 $\pm$ 3.0    | 69.4 $\pm$ 20.0    | 35.8 $\pm$ 4.9     | 14.1 $\pm$ 1.1      |
| <b>IL-1<math>\beta</math></b>                   | 44.0 $\pm$ 18.0         | 19.5 $\pm$ 2.3     | 127.3 $\pm$ 24.4  | 124.0 $\pm$ 80.6   | 35.8 $\pm$ 4.9     | 138.9 $\pm$ 5.7     |
| <b>GM-CSF</b>                                   | 1.0 $\pm$ 0.0           | 112.0 $\pm$ 43.0   | 1.3 $\pm$ 0.3     | 7.2 $\pm$ 0.9      | 2.5 $\pm$ 0.5      | 4.3 $\pm$ 1.2       |
| <b>MIP-1<math>\alpha</math></b>                 | 422.0 $\pm$ 111.0       | 128.5 $\pm$ 16.9   | 121.7 $\pm$ 14.5  | 2966.0 $\pm$ 853.3 | 812.6 $\pm$ 124.1  | 651.0 $\pm$ 71.5    |
| <b>IL-6</b>                                     | 4.5 $\pm$ 0.5           | 8.7 $\pm$ 5.2      | 6.2 $\pm$ 2.4     | 9.3 $\pm$ 1.3      | 1477.6 $\pm$ 438.2 | 9.5 $\pm$ 1.5       |

**SD stands for Standard Deviation**

30  
31  
32  
33  
34  
35  
36

**Table 3. Levels of pro-immune molecules secreted from spleen myeloma tumor microenvironment (TME) after 3 or 24 hours of treatment. The Means  $\pm$  SD of levels of the secreted molecules are shown.**

| <b>After 3 hours</b> | <b>Vehicle (1x-PBS)</b> | <b>BM</b> | <b>PBMCs</b> | <b>MYXV</b> | <b>BM + MYXV</b> | <b>PBMCs + MYXV</b> |
|----------------------|-------------------------|-----------|--------------|-------------|------------------|---------------------|
|----------------------|-------------------------|-----------|--------------|-------------|------------------|---------------------|

|                                                           |                         |                        |                    |                         |                         |                     |
|-----------------------------------------------------------|-------------------------|------------------------|--------------------|-------------------------|-------------------------|---------------------|
| <b>IFN-<math>\gamma</math></b><br><b>(Th<sub>1</sub>)</b> | 122.5 $\pm$ 54.5        | 98.5 $\pm$ 41.5        | 90.5 $\pm$ 11.5    | 3002.0 $\pm$ 278.7      | 5138.5 $\pm$ 810.1      | 2191.7 $\pm$ 287.9  |
| <b>IL-10</b><br><b>(Th<sub>1</sub>)</b>                   | 1046.2 $\pm$ 110.7      | 1282.0 $\pm$ 276.0     | 1145.7 $\pm$ 44.7  | 7718.7 $\pm$ 324.9      | 5791.5 $\pm$ 553.5      | 3813.5 $\pm$ 208.6  |
| <b>IL-12p70</b><br><b>(Th<sub>1</sub>)</b>                | 15.0 $\pm$ 5.0          | 8.0 $\pm$ 3.5          | 15.0 $\pm$ 1.5     | 17.5 $\pm$ 0.6          | 25.7 $\pm$ 3.2          | 12.8 $\pm$ 0.7      |
| <b>IL-4</b><br><b>(Th<sub>2</sub>)</b>                    | 24.5 $\pm$ 11.7         | 26.3 $\pm$ 13.0        | 19.3 $\pm$ 1.0     | 66.0 $\pm$ 10.4         | 43.8 $\pm$ 6.4          | 76.3 $\pm$ 14.4     |
| <b>IL-5</b><br><b>(Th<sub>2</sub>)</b>                    | 21.0 $\pm$ 4.0          | 7.0 $\pm$ 03.0         | 8.0 $\pm$ 1.0      | 17.2 $\pm$ 3.2          | 16.1 $\pm$ 1.1          | 21.7 $\pm$ 1.7      |
| <b>TNF<math>\alpha</math></b>                             | 44.5 $\pm$ 13.0         | 32.2 $\pm$ 12.2        | 27.0 $\pm$ 3.5     | 116.5 $\pm$ 7.0         | 250.7 $\pm$ 34.0        | 71.5 $\pm$ 2.5      |
| <b>IL-1<math>\alpha</math></b>                            | 129.0 $\pm$ 7.5         | 172.5 $\pm$ 44.2       | 90.5 $\pm$ 4.0     | 510.2 $\pm$ 140.9       | 2024.4 $\pm$ 198.8      | 325.8 $\pm$ 11.1    |
| <b>IL-1<math>\beta</math></b>                             | 188.5 $\pm$ 4.0         | 89.0 $\pm$ 34.0        | 132.5 $\pm$ 12.5   | 437.0 $\pm$ 136.9       | 2574.7 $\pm$ 622.7      | 204.8 $\pm$ 30.6    |
| <b>GM-CSF</b>                                             | 6.7 $\pm$ 1.7           | 4.0 $\pm$ 2.0          | 5.0 $\pm$ 1.0      | 70.0 $\pm$ 8.9          | 160.9 $\pm$ 43.0        | 33.5 $\pm$ 4.8      |
| <b>MIP-1<math>\alpha</math></b>                           | 2112.5 $\pm$ 75.5       | 2700.5 $\pm$<br>1700.5 | 1746.7 $\pm$ 348.7 | 10917.7 $\pm$<br>819.2  | 11141.7 $\pm$<br>1255.4 | 5933.8 $\pm$ 578.4  |
| <b>IL-6</b>                                               | 16.0 $\pm$ 5.5          | 18.0 $\pm$ 4.0         | 10.5 $\pm$ 1.5     | 270.8 $\pm$ 124.1       | 1477.6 $\pm$ 438.2      | 62.0 $\pm$ 2.9      |
| <b>After 24 hours</b>                                     | <b>Vehicle (1x-PBS)</b> | <b>BM</b>              | <b>PBMCs</b>       | <b>MYXV</b>             | <b>BM + MYXV</b>        | <b>PBMCs + MYXV</b> |
| <b>IFN-<math>\gamma</math></b><br><b>(Th<sub>1</sub>)</b> | 186.2 $\pm$ 4.2         | 54.5 $\pm$ 2.9         | 122.5 $\pm$ 41.5   | 55.5 $\pm$ 9.1          | 2703.1 $\pm$ 331.2      | 2223.8 $\pm$ 309.1  |
| <b>IL-10</b><br><b>(Th<sub>1</sub>)</b>                   | 1395.0 $\pm$ 294.0      | 867.0 $\pm$ 24.9       | 912.0 $\pm$ 98.1   | 3788.0 $\pm$ 683.3      | 2105.1 $\pm$ 98.2       | 2127.8 $\pm$ 60.9   |
| <b>IL-12p70</b><br><b>(Th<sub>1</sub>)</b>                | 6.5 $\pm$ 1.0           | 4.5 $\pm$ 1.2          | 3.8 $\pm$ 0.9      | 16.8 $\pm$ 3.2          | 15.2 $\pm$ 0.8          | 13.9 $\pm$ 1.7      |
| <b>IL-4</b><br><b>(Th<sub>2</sub>)</b>                    | 20.0 $\pm$ 7.7          | 11.3 $\pm$ 1.2         | 12.0 $\pm$ 0.3     | 21.4 $\pm$ 4.3          | 24.7 $\pm$ 2.6          | 18.5 $\pm$ 1.0      |
| <b>IL-5</b><br><b>(Th<sub>2</sub>)</b>                    | 5.5 $\pm$ 1.5           | 3.3 $\pm$ 0.3          | 5.7 $\pm$ 0.3      | 9.8 $\pm$ 1.0           | 12.0 $\pm$ 0.0          | 11.4 $\pm$ 1.2      |
| <b>TNF<math>\alpha</math></b>                             | 28.0 $\pm$ 1.5          | 18.5 $\pm$ 1.5         | 17.8 $\pm$ 2.0     | 80.2 $\pm$ 9.2          | 4692.7 $\pm$ 189.9      | 50.5 $\pm$ 7.0      |
| <b>IL-1<math>\alpha</math></b>                            | 107.6 $\pm$ 8.2         | 47.2 $\pm$ 7.8         | 42.6 $\pm$ 5.0     | 627.0 $\pm$ 206.0       | 539.5 $\pm$ 32.9        | 318.3 $\pm$ 56.8    |
| <b>IL-1<math>\beta</math></b>                             | 95.0 $\pm$ 4.0          | 47.2 $\pm$ 7.8         | 105.2 $\pm$ 7.0    | 233.4 $\pm$ 17.7        | 538.0 $\pm$ 39.0        | 274.3 $\pm$ 40.0    |
| <b>GM-CSF</b>                                             | 3.5 $\pm$ 0.5           | 4.3 $\pm$ 0.3          | 4.0 $\pm$ 0.6      | 11.7 $\pm$ 2.9          | 9.5 $\pm$ 1.2           | 7.6 $\pm$ 0.2       |
| <b>MIP-1<math>\alpha</math></b>                           | 2514.5 $\pm$ 340.5      | 2013.2 $\pm$ 56.5      | 790.8 $\pm$ 136.6  | 11667.6 $\pm$<br>2233.8 | 4692.7 $\pm$ 189.9      | 2667.3 $\pm$ 373.6  |
| <b>IL-6</b>                                               | 14.5 $\pm$ 2.5          | 7.7 $\pm$ 3.3          | 6.3 $\pm$ 0.9      | 24.0 $\pm$ 7.5          | 20.0 $\pm$ 1.6          | 16.3 $\pm$ 1.6      |

37 **SD stands for Standard Deviation**

38  
39  
40
